# Supplementary material for: Synthesis and potential use of 1,8-naphthalimide type 1O2 sensor molecules
Source: Royal Society of Chemistry journal article supplement (doi:10.1039/c2pp25253h), 2012-11-01

## Supporting Info

### **Synthesis and potential use of 1,8-naphthalimide type $^1\text{O}_2$ sensor molecules**

Tamás Kálai,<sup>a,b</sup> Éva Hideg<sup>c,d</sup>, Ferhan Ayaydin<sup>e</sup> and Kálmán Hideg<sup>a,b\*</sup>

<sup>a</sup>Department of Organic and Medicinal Chemistry, University of Pécs, Pécs, Hungary.

<sup>b</sup>MTA-PTE Nuclear and Mitochondrial Interactions Research Group, University of Pécs, Pécs, Hungary.

<sup>c</sup>Institute of Biology, University of Pécs, Pécs, Hungary.

<sup>d</sup>Institute of Plant Biology Biological Research Center, Szeged, Hungary.

<sup>e</sup>Cellular Imaging Laboratory, Biological Research Center, Szeged, Hungary

## Content

P2: Green and red fluorescence intensities over comparable regions in Fig. 5C and 5F to support the idea that compound **4** – unlike **7** – penetrates chloroplasts.

4 (chlorophyll intensified, remeasured)

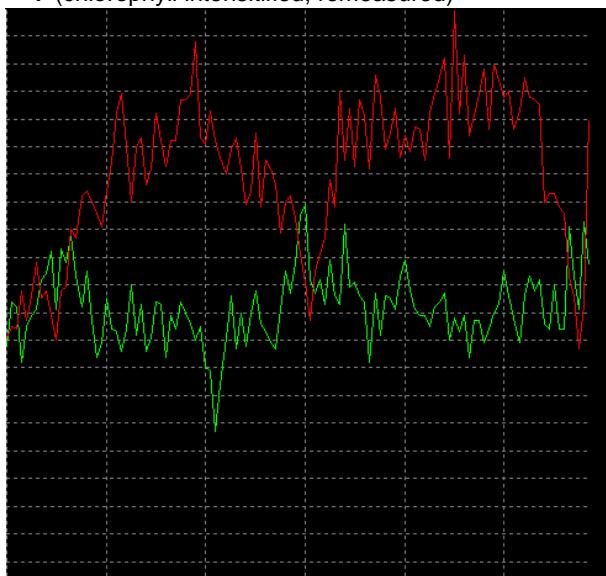

7

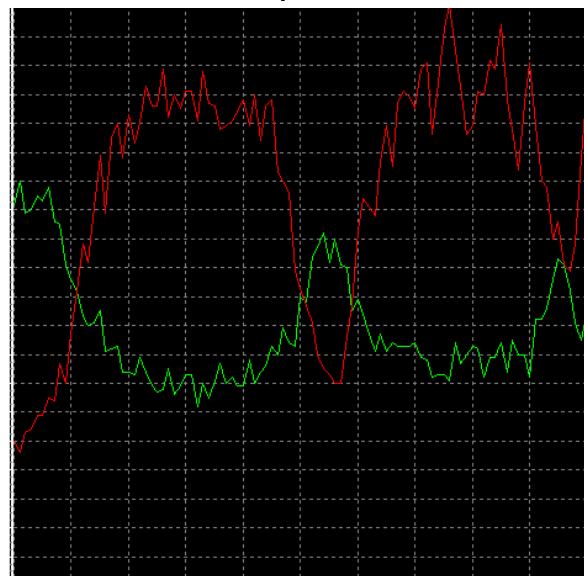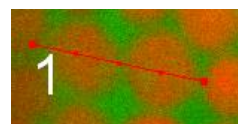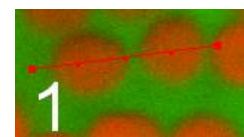

Supplement: c2pp25253h.pdf [file c2pp25253h.pdf]
